# Supplementary material
Source: publisher figshare collection journal article supplement (https://brill.figshare.com/ndownloader/files/14478971)
Supplement: Supplementary file 1 [file 14478971]

Lecture 3

**Metaphor, culture, and embodiment**

**Introduction: culture as meaning**

What is culture? Humanities.

“joint meaning making”

“Man is an animal suspended in webs of significance he himself has spun. I take culture to be those webs, and the analysis of it to be therefore not an experimental science in search of law but an interpretative one in search of meaning" (Geertz 1973, 5).

I suggest that we approach both culture and language as “webs of significance” that people both create and understand.

Culture as nonmonolithic. Did not have a sophisticated theory of meaning making. Experimental science.

**Brain/mind, meaning, and culture**

“first cognitive revolution” - “computer metaphor”

“second cognitive revolution” - “embodiment premise”

“objectivist view of the world” - “experientialist view”

Thought: independent of the body. the mind is transcendent. is also abstract; it consists of the manipulation of abstract symbols. an abstract machine that manipulates abstract symbols. software and hardware.

Language: highly structured form? or meaning and conceptualization?

Grammar: a structured set of forms, or as form that only serves the purpose of conveying our conceptualized knowledge of the world?

What is meaning? truth conditions. *snow* or *tree.* - concepts in our conceptual system?

How do the forms that we use become meaningful? convention and reference - the human body plays a role in making forms and signs meaningful?

objectivist philosophy: Meaning can be defined by a set of necessary and sufficient conditions. *square*.

experientialist philosophy: meanings are conceptual categories that are defined by a central member of a category. symbols become meaningful as a result of our embodied experiences. tree.

Culture: a large set of meanings shared by a group of people.

This requires, of course, for people to have the organ of meaning making, the brain, the cognitive processes of meaning making, the body that makes linguistic and nonlinguistic signs meaningful and that imbues with meaning all objects and events that are not signs themselves (e.g., a tree that we conceptualize as being vertical and tall), and the physical and social environment in which the brain and the body jointly evolve.

Language: a set of linguistic signs, that is, pairings of form and meaning

a repository of meanings

stabilizing and preserving a culture

Discourse: particular assemblies of meanings concerning particular subject matters. Ideologies.

**Imaginative reason**

human reason: imaginative “alternative construal”

*framing* and *metaphor*.

meaning is relative to how we frame experience.

Kpelle of Liberia.

“image schemas” (“container,” “source-path-goal,” “force,” etc.) provide meaning for much of our experience either directly or indirectly. more is up.

“primary metaphors” - universal. nonuniversal - “complex metaphors.”

another line of research: context.

Embodiment – Universality

Context – Variation

“pressure of coherence”

**Experientialism and postmodernism**

alternative construal and alternative conceptual systems - postmodernist ideas.

alternativity in understanding the world - social-constructionist and relativistic attitude in postmodernist-poststructuralist thought.

social construction of meaning: it is relative to context.

alternativity in conceptualization in experientialism and the relativism of postmodernism vs. embodiment.

If the particular bodies we have play a role in how we mentally represent abstract concepts and result in particular abstract concepts, then different bodies should result in different abstract concepts.

good is right and bad is left. “He is my *right hand* man.”

For the right handers, good was right (good is right), whereas for the left handers, good was left (good is left). we conceptualize abstract concepts in body-specific ways.

challenge both to the possibility of unlimited alternativity in conceptualization and, consequently, to that of unlimited social constructions.

Objection: there is a huge amount of “cultural and historical baggage.”

different predictions: Cultural experience should lead to good being associated with right (conventional idioms in English language and culture make this manifest) for both right-handers and left-handers (there are no idioms in English where good is left), while physical experience should lead to good associated with right in the case of right-handers and left in the case of left-handers.

body-specificity leads to specificity in conceptualization.

in some cognitive linguistic work embodiment is conceived somewhat mechanically;

anger is heat: Heat was a major component in the concept of anger between 850 and 950, and then after a long decline it began to play a key role again at around 1400—possibly as a result of the emergence of the humoral view of emotions in Europe.

same kind of fluctuation in the use of the domain of “swelling.” hot fluid in a container.

“differential experiential focus” - multiple bodily basis.

**Embodiment, metaphor, culture**

What then is the relationship among embodiment, metaphor, and culture? - “pressure of coherence”

the angry person is a pressurized container.

“body-based social constructionism” (Kövecses, 2000/2003).

predominantly body-based metaphors. knowing is seeing.

predominantly cultural basis. time is money.

Bodily basis : Body-based social constructionism : Cultural basis

good is left - body and culture separated

no “pure” cases.

body and culture work jointly at all stages of the cline.

**References**

Alverson, Hoyt. 1991. Metaphor and experience: Looking over the notion of image schema. In *Beyond Metaphor: The Theory of Tropes in Anthropology*, J. Fernandez, ed., 94-117. Stanford: Stanford University Press.

Casasanto, D. in press. Embodiment of Abstract Concepts: Good and bad in right- and left-handers. *Journal of Experimental Psychology*: General.

Charteris-Black, Jonathan. 2004. *Corpus Approaches to Critical Metaphor Analysis*. Palgrave Macmillan.

Fillmore, Charles. 1982. Frame semantics. In *Linguistics in the Morning Calm*: 111-137. The Linguistic Society of Korea. Hanshin.

Geeraerts, Dirk and Stephan Grondelaers. 1995. Looking back at anger: cultural traditions and metaphorical patterns. In J. Taylor and R. MacLaury (eds.) *Language and the cognitive construal of the world*. Berlin: Gruyter.

Geertz, C. 1973. *The Interpretation of Culture.* New York: Basic Books.

Gevaert, C. 2005. The anger is heat question: detecting cultural influence on the conceptualization of anger through diachronic corpus analysis. N. Delbacque, J. Van der Auwera, and G. Geeraerts, eds., *Perspectives on Variation: Sociolinguistic, Historical, Comparative.* Berlin: Mouton de Gruyter. 195-208.

Glick, J. 1975. Cognitive development in cross-cultural perspective. In *Review of child development research: Vol. 4.*,F. Horowitz, ed., Chicago: University of Chicago Press. 595-654.

Goatly, Andrew. 2007. *Washing the Brain. Metaphor and Hidden Ideology*. Amsterdam: John Benjamins.

Johnson, M. 1987. *The Body in the Mind.* Chicago: The University of Chicago Press.

Kövecses, Z. 1990. *Emotion Concepts*. Berlin/New York: Springer Verlag.

Kövecses, Z. 2000/2003. *Metaphor and Emotion.* New York: Cambridge University Press.

Kövecses, Z. 2002. *Metaphor. A Practical Introduction.* New York: Oxford University Press. Forthcoming. Second edition.

Kövecses, Z. 2005. *Metaphor in Culture. Universality and Variation.* New York: Cambridge University Press.

Kövecses, Z. 2006. *Language, Mind, and Culture. A Practical Introduction.* New York: Oxford University Press.

Lakoff G. and M. Johnson. 1980. *Metaphors We Live By.* Chicago: The University of Chicago Press.

Lakoff, G. 1987. *Women, Fire, and Dangerous Things.* Chicago: The University of Chicago Press.

Lakoff, G. and M. Johnson. 1999. *Philosophy in the Flesh.* New York: Basic Books.

Langacker, Ronald. 1987. *Foundations of Cognitive Grammar. Theoretical Prerequisites*. Vol. 1. Stanford: Stanford University Press.

Musolff, Andreas. 2004. *Metaphor and political discourse. Analogical reasoning in debates about Europe*. London: Palgrave Macmillan.

Schank, Robert and Robert Abelson. 1977. *Scripts, Plans, Goals, and Understanding*. Hillsdale, N.J.: Lawrence Erlbaum.
